# Supplementary material
Source: publisher site journal article supplement (https://www.dovepress.com/article/487825)
Supplement: Supplementary file 1 [file get_supplementary_file.php]

| Supplementary table 1: Overview of register usage | |
| --- | --- |
| **Register** | **Variables, including subcodes** |
| **The National Patient Register** | Healthcare contacts  Comorbidities, according to the International Classification of Diseases, tenth version |
| Outpatient clinics specialised in endocrinology | speciality code 008 |
| Atrial fibrillation | I48 |
| Acute myocardial infarction | I21, I22, I23 |
| Ischaemic heart disease | I20 |
| Ischemic stroke | I63, I64, I65, I66, I67 |
| Peripheral arterial disease | I700, I702, I708, I709, I740, I739A, I739C |
| **The Health Insurance Register** | Healthcare contacts (GP) |
| **The Register of Pharmaceutical Sales** | Medicine utilisation  Surrogate diagnosis of HT and DM according to the Anatomical Therapeutic Chemical classification system |
| HT | C02, C07, C08, C09, C03AA, C03DA01 |
| DM | A10 |
| Antiplatelet therapy | B01AC |
| Cholesterol-lowering drugs | C10 |
| Anticoagulants | B01AA03, B01AA04, B01AF01, B01AF02, B01AE07, B01AX06 |
| Antihypertensives | C02, C07, C08, C09, C03AA, C03DA01 |
| **The Regional laboratory Database** | Laboratory results  (HbA1c before and after screening, creatinine, total cholesterol, low-density lipoprotein cholesterol |
| **The Danish Civil Registration** | Baseline information  Sex, follow-up, education, ethnicity, marital status, time of death |
| **VISP, data from the screening programme** | Baseline information  Smoking, exercise, waist, body mass index, haemoglobin A1c at screening |

| **Supplementary table 2: Comparative analyses of healthcare utilisation, total n = 2 386** | | | | | | |
| --- | --- | --- | --- | --- | --- | --- |
|  | HbA1c < 42 | | HbA1c [42 – 48[ | | HbA1c ≥ 48 | |
| Characteristics | n=1 911 | 95 % CI* | n=393 | 95 % CI | n=82 | 95 % CI |
| Use of the healthcare system |  |  |  |  |  |  |
| **Persons with ≥1 contacts at** **outpatient clinics specialised in endocrinology, n (%)** |  |  |  |  |  |  |
| 1 year pre-screening | 14 (0.7) | 0.4 – 1.2 | 6 (1.5) | 0.6 – 3.3 | ≤ 3** |  |
| OR | 1 |  | 2,10 | 0,80 – 5.50 |  |  |
| 1 year post-screening | 15 (0.8) | 0.4 – 1.3 | 5 (1.3) | 0.4 – 2.9 | ≤ 3** |  |
| Pre- vs. post-screening OR | 1.07 | 0.53 – 2.18 | 0.83 | 0.25 – 2.77 |  |  |
| ROR | 1 |  | 0.78 | 0,19 – 3.13 |  |  |
| **Contacts with outpatient clinics specialised in endocrinology, n mean** |  |  |  |  |  |  |
| 1 year pre-screening | 0.007 | 0.003 – 0.011 | 0.018 | 0.003 – 0.033 | 0.012 | -0.012 – 0.036 |
| IR | 1 |  | 2.43 | 0.91 – 6.51 | 1.66 | 0.22 – 12.51 |
| 1 year post-screening | 0,008 | 0.004 – 0.012 | 0.013 | 0.002 – 0.024 | 0.012 | -0.012 – 0.036 |
| Pre- vs. post-screening IR | 1.07 | 0.53 – 2.16 | 0.71 | 0.21 – 2.41 | 1 | 0.06 – 16.00 |
| RIR | 1 |  | 0.67 | 0.16 – 2.71 | 0.93 | 0.05 – 16.29 |
| **Use of medicine** |  |  |  |  |  |  |
| **Anticoagulant therapy, n (%)** |  |  |  |  |  |  |
| 1 year pre-screening | 91 (4.8) | 3.9 – 5.8 | 24 (6,1) | 4.0 – 9.0 | 6 (7.3) | 2.7 – 15.3 |
| OR | 1 |  | 1.30 | 0.82 – 2.07 | 1.58 | 0,67 – 3.72 |
| 1 year post-screening | 118 (6.2) | 5.1 – 7.4 | 29 (7.4) | 5.0 – 10.4 | 6 (7.3) | 2,7 – 15.3 |
| Pre- vs. post-screening OR | 1.32 | 1.17 – 1.49 | 1.22 | 0.99 – 1.51 | 1 | - |
| ROR | 1 |  | 0.93 | 0.73 – 1.19 | 0.76 | 0.67 – 0.86 |
| **Use of laboratory measurements** |  |  |  |  |  |  |
| **Persons with ≥1 measurement of Creatinine, n (%)** |  |  |  |  |  |  |
| 1 year pre-screening | 1 158 (60.6) | 58.4 – 62.8 | 241 (61.3) | 56.3 – 66.1 | 50 (61.0) | 49.6 – 71.6 |
| OR | 1 |  | 1.03 | 0.83 – 1.29 | 1.02 | 0.65 – 1.60 |
| 1 year post-screening | 1 189 (62.2) | 60.0 – 64.4 | 283 (72.0) | 67.3 – 76.4 | 67 (81.7) | 71.6 – 89.4 |
| Pre- vs. post-screening OR | 1.07 | 0.96 – 1.19 | 1.62 | 1.25 – 2.11 | 2.86 | 1.59 – 5.14 |
| ROR | 1 |  | 1.52 | 1.14 – 2.01 | 2.67 | 1.47 – 4.85 |
| **Persons with ≥1 measurement of LDL-cholesterol, n (%)** |  |  |  |  |  |  |
| 1 year pre-screening | 932 (48.8) | 46.5 – 51.0 | 195 (49.6) | 44.6 – 54.7 | 44 (53.7) | 42.3 – 64.8 |
| OR | 1 |  | 1.03 | 0.83 – 1.29 | 1.22 | 0.78 – 1.89 |
| 1 year post-screening | 989 (51.8) | 49.5 – 54.0 | 248 (63.1) | 58.1 – 67.9 | 63 (76.8) | 66.2 – 85.4 |
| Pre- vs. post-screening OR | 1.13 | 1.01 – 1.25 | 1.74 | 1.35 – 2.24 | 2.86 | 1,56 – 5.26 |
| ROR | 1 |  | 1.54 | 1.17 – 2.03 | 2.54 | 1,37 – 4.71 |
| * 95 % CI for the comparative analyses OR and IRR are calculated using logarithmic analyses for binary outcomes (OR) and Possion analyses for continuate outcomes (RR) - in both cases, robust intervals are reported.  ** Due to data reporting rules, we are not allowed to specify the number here. | | | | | | |
